1 **Interim Analysis of Risk Factors for Severe Outcomes among a Cohort of Hospitalized Adults Identified**  
2 **through the U.S. Coronavirus Disease 2019 (COVID-19)-Associated Hospitalization Surveillance**  
3 **Network (COVID-NET)**

4  
5 Kim L<sup>1,2\*</sup>, Garg S<sup>1,2,\*</sup>, O'Halloran A<sup>1</sup>, Whitaker M<sup>1,3</sup>, Pham H<sup>1</sup>, Anderson EJ<sup>4,5,6</sup>, Armistead I<sup>7</sup>, Bennett NM<sup>8</sup>,  
6 Billing L<sup>9</sup>, Como-Sabetti K<sup>10</sup>, Hill M<sup>11</sup>, Kim S<sup>12</sup>, Monroe ML<sup>13</sup>, Muse A<sup>14</sup>, Reingold A<sup>15</sup>, Schaffner W<sup>16</sup>,  
7 Sutton M<sup>17</sup>, Talbot HK<sup>16</sup>, Torres SM<sup>18</sup>, Yousey-Hindes K<sup>19</sup>, Holstein R<sup>1,20</sup>, Cummings C<sup>1,21</sup>, Brammer L<sup>1</sup>, Hall  
8 A<sup>1</sup>, Fry A<sup>1</sup>, Langley GE<sup>1</sup>.

9  
10 Affiliations:

11 <sup>1</sup>CDC COVID-NET Team, Atlanta, GA

12 <sup>2</sup>US Public Health Service, Rockville, MD

13 <sup>3</sup>Eagle Global Scientific, Atlanta, GA

14 <sup>4</sup>Departments of Medicine and Pediatrics, Emory University School of Medicine, Atlanta, GA

15 <sup>5</sup>Emerging Infections Program, Georgia Department of Health, Atlanta, GA

16 <sup>6</sup>Veterans Affairs Medical Center, Atlanta, GA

17 <sup>7</sup>University of Colorado Anschutz Medical Campus, Aurora, CO

18 <sup>8</sup>University of Rochester School of Medicine and Dentistry, Rochester, NY

19 <sup>9</sup>Ohio Department of Health, Columbus, OH

20 <sup>10</sup>Minnesota Department of Health, St. Paul, MN

21 <sup>11</sup>Salt Lake County Health Department, Salt Lake City, UT

22 <sup>12</sup>Michigan Department of Health and Human Services, Lansing, MI

23 <sup>13</sup>Maryland Department of Health, Baltimore, MD

24 <sup>14</sup>New York State Department of Health, Albany, NY

25 <sup>15</sup>University of California Berkeley, Berkeley, CA

26 <sup>16</sup>Vanderbilt University School of Medicine, Nashville, TN

27 <sup>17</sup>Oregon Health Authority, Portland, OR

28 <sup>18</sup>New Mexico Department of Health, Santa Fe, NM

29 <sup>19</sup>Connecticut Emerging Infections Program, Yale School of Public Health, New Haven, CT

30 <sup>20</sup>Oak Ridge Institute for Science and Education, Oak Ridge, TN

31 <sup>21</sup>Chickasaw Nation Industries, Norman, OK

32

33

34 \*These authors contributed equally to this work.

35

36 Corresponding author: Lindsay Kim, 1600 Clifton Road, MS H24-5, Atlanta, GA 30329, 404-639-5218,

37 [LKim@cdc.gov](mailto:LKim@cdc.gov); Shikha Garg, 1600 Clifton Road, MS H24-7, Atlanta, GA 30329, 404-639-6142,

38 [izj7@cdc.gov](mailto:izj7@cdc.gov)

39

40 Disclaimer: The conclusions, findings, and opinions expressed by the authors do not necessarily reflect

41 the official position of the United States Department of Health and Human Services, the Public Health

42 Service, the CDC, or the authors' affiliated institutions.

43

44 Running title: Severe outcomes among hospitalized COVID-19 adults

45

46 Word Count: 3492/3500

47

48 **ABSTRACT**

49 **Background:** As of May 15, 2020, the United States has reported the greatest number of coronavirus  
50 disease 2019 (COVID-19) cases and deaths globally.

51 **Objective:** To describe risk factors for severe outcomes among adults hospitalized with COVID-19.

52 **Design:** Cohort study of patients identified through the Coronavirus Disease 2019-Associated  
53 Hospitalization Surveillance Network.

54 **Setting:** 154 acute care hospitals in 74 counties in 13 states.

55 **Patients:** 2491 patients hospitalized with laboratory-confirmed COVID-19 during March 1–May 2, 2020.

56 **Measurements:** Age, sex, race/ethnicity, and underlying medical conditions.

57 **Results:** Ninety-two percent of patients had  $\geq 1$  underlying condition; 32% required intensive care unit

58 (ICU) admission; 19% invasive mechanical ventilation; 15% vasopressors; and 17% died during

59 hospitalization. Independent factors associated with ICU admission included ages 50-64, 65-74, 75-84

60 and  $\geq 85$  years versus 18-39 years (adjusted risk ratio (aRR) 1.53, 1.65, 1.84 and 1.43, respectively); male

61 sex (aRR 1.34); obesity (aRR 1.31); immunosuppression (aRR 1.29); and diabetes (aRR 1.13).

62 Independent factors associated with in-hospital mortality included ages 50-64, 65-74, 75-84 and  $\geq 85$

63 years versus 18-39 years (aRR 3.11, 5.77, 7.67 and 10.98, respectively); male sex (aRR 1.30);

64 immunosuppression (aRR 1.39); renal disease (aRR 1.33); chronic lung disease (aRR 1.31); cardiovascular

65 disease (aRR 1.28); neurologic disorders (aRR 1.25); and diabetes (aRR 1.19). Race/ethnicity was not

66 associated with either ICU admission or death.

67 **Limitation:** Data were limited to patients who were discharged or died in-hospital and had complete

68 chart abstractions; patients who were still hospitalized or did not have accessible medical records were

69 excluded.

70 **Conclusion:** In-hospital mortality for COVID-19 increased markedly with increasing age. These data help  
71 to characterize persons at highest risk for severe COVID-19-associated outcomes and define target  
72 groups for prevention and treatment strategies.

73

74 **Funding Source:** This work was supported by grant CK17-1701 from the Centers of Disease Control and  
75 Prevention through an Emerging Infections Program cooperative agreement and by Cooperative  
76 Agreement Number NU38OT000297-02-00 awarded to the Council of State and Territorial  
77 Epidemiologists from the Centers for Disease Control and Prevention.

78

## 79 **Introduction**

80           In December 2019, an outbreak of a novel coronavirus disease, termed coronavirus disease-  
81 2019 (COVID-19), was reported in China caused by a newly identified coronavirus, severe acute  
82 respiratory syndrome coronavirus-2 (SARS-CoV-2). Since then, approximately 4.5 million cases of  
83 COVID-19 have been reported globally (1). As of May 15, approximately 1.4 million cases, including  
84 nearly 86,000 deaths, have been reported in the United States, and case counts continue to rise (1) with  
85 evidence of widespread community transmission (2).

86           Previous reports from China, Italy, and New York City have demonstrated that hospitalized  
87 patients are generally older and have underlying medical conditions, such as hypertension and diabetes  
88 (3-5). These studies have also found that older patients and those with certain underlying medical  
89 conditions like diabetes were at higher risk for severe outcomes (3, 6, 7). Among cases reported to the  
90 U.S. Centers for Disease Control and Prevention (CDC) from local and state health departments, the  
91 prevalence of underlying medical conditions increased as severity of infections increased (8, 9), although  
92 findings were limited by missing or incomplete information. Questions remain about the independent  
93 association of sex, race/ethnicity and specific underlying conditions with severe outcomes among  
94 persons hospitalized with COVID-19, after adjusting for age and other important potential confounders.

95           Comprehensive data on U.S. patients with severe COVID-19 infections are needed to better  
96 inform clinicians' understanding of groups at risk for poor outcomes and to inform current prevention  
97 efforts and future interventions. We rapidly implemented population-based surveillance for laboratory-  
98 confirmed COVID-19-associated hospitalizations, collecting clinical data from hospitalized patients in 154  
99 hospitals in 13 states since March 1, 2020. In this interim analysis restricted to patients who were  
100 discharged or died in-hospital and had completed medical chart abstractions, we describe the  
101 characteristics of U.S. adults hospitalized with COVID-19 and assess risk factors for intensive care unit  
102 (ICU) admission and in-hospital mortality.

103

## 104 **METHODS**

### 105 ***Surveillance Overview***

106           The Coronavirus Disease 2019-Associated Hospitalization Surveillance Network (COVID-NET) has  
107 been previously described (10). Eligible COVID-19-associated hospitalizations occurred among persons  
108 who (1) resided in a pre-defined surveillance catchment area; and (2) had a positive SARS-CoV-2 test  
109 within 14 days prior to or during hospitalization. Hospitalization was defined as admission to an  
110 inpatient ward for any length of time, an observation unit stay for  $\geq 24$  hours, or a combined stay in an  
111 emergency department and observation unit for  $\geq 24$  hours.

112           COVID-NET surveillance occurs in acute care hospitals within 99 counties located in 14 states  
113 (California, Colorado, Connecticut, Georgia, Iowa, Maryland, Michigan, Minnesota, New Mexico, New  
114 York, Ohio, Oregon, Tennessee, and Utah), covering a catchment population of approximately 32 million  
115 persons (~10% of the U.S. population). Although COVID-NET includes all age groups, for this analysis, we  
116 excluded children <18 years of age due to small counts (n=101) and one surveillance site (Iowa) for  
117 which medical chart abstractions were not conducted on identified cases. We also excluded patients  
118 who were still hospitalized at the time of this analysis and all patients for whom medical chart  
119 abstractions had not yet been completed. Because the COVID-19 pandemic limited the ability of  
120 surveillance officers to access medical records at facilities, patients were more likely to be included in  
121 this analysis if they were hospitalized at facilities that provided surveillance officers remote chart access,  
122 participated in Health Information Exchanges, or were able to mail or fax records. COVID-NET  
123 surveillance was initiated for cases with hospital admission on or after March 1, 2020.

124           Laboratory-confirmed COVID-19-associated hospitalizations were identified using laboratory  
125 and reportable condition databases, hospital infection control databases, electronic medical records,

126 and/or review of hospital discharge records. Laboratory tests were ordered at the discretion of the  
127 treating healthcare provider.

128 Medical chart reviews for demographic and clinical data were conducted by trained surveillance  
129 officers using a standard case report form. Underlying medical conditions were categorized into major  
130 groups (Appendix Table 1). Obesity and severe obesity were defined as a calculated body mass index  
131 (BMI)  $\geq 30$  kg/m<sup>2</sup> and BMI  $\geq 40$  kg/m<sup>2</sup>, respectively. Chest radiograph results were obtained from the  
132 radiology reports and not from review of the original radiograph. We defined severe outcomes as either  
133 ICU admission or in-hospital mortality. We hypothesized that increasing age and underlying medical  
134 conditions would be associated with an increased risk of ICU admission and in-hospital mortality.

135

### 136 ***Statistical Analysis***

137 After the exclusions noted above, we included adults hospitalized within 154 acute care  
138 hospitals in 74 counties in 13 states with an admission date during March 1–May 2, 2020 who had either  
139 been discharged from the hospital or died during hospitalization and had complete medical chart  
140 abstractions. We calculated proportions using the number of patients with data available on each  
141 characteristic as the denominator.

142 To construct multivariable models for ICU admission and in-hospital mortality, we first assessed  
143 collinearity among underlying medical condition categories and outpatient use of ACE-inhibitors and  
144 ARBs. We examined the association of demographic factors, underlying medical conditions, and  
145 outpatient use of ACE-inhibitors and ARBs with ICU admission and in-hospital death using chi square  
146 tests. Variables considered for inclusion in the final models included current or former smoker,  
147 hypertension, obesity, diabetes, chronic lung disease (CLD), cardiovascular disease (CVD) (excluding  
148 hypertension), neurologic disorders, renal disease, immunosuppression, gastrointestinal/liver disease,  
149 hematologic conditions, rheumatologic/autoimmune conditions, and outpatient use of ACE-inhibitors or

150 ARBs. All multivariable models included age categorized into the following groups (18–39, 40–49, 50–  
151 64, 65–74, 75–84, and ≥85 years), sex, and race/ethnicity. Other variables with p-values <0.10 in  
152 bivariate analyses were included in the multivariable analyses. Log-linked Poisson generalized  
153 estimating equations regression with an exchangeable correlation matrix (11, 12), clustered by site, was  
154 used to generate adjusted risk ratios (aRR), 95% confidence intervals (CI), and two-sided p-values for the  
155 risk of ICU admission and in-hospital death. We also constructed separate multivariable models to  
156 examine the association between the number of underlying medical conditions and ICU admission or in-  
157 hospital death. Two-sided p-values <0.05 were considered statistically significant. All analyses were  
158 performed using the SAS 9.4 software (SAS Institute Inc., Cary, NC, USA).

159         These data were collected as part of routine public health surveillance and determined to be  
160 non-research by CDC. Participating sites obtained approval for the COVID-NET surveillance protocol  
161 from their respective state and local IRBs, as required.

162

### 163 ***Role of the Funding Source***

164         This work was supported by grant CK17-1701 from the CDC through an Emerging Infections  
165 Program cooperative agreement and by cooperative agreement NU38OT000297-02-00 awarded to the  
166 Council of State and Territorial Epidemiologists from the CDC.

167

### 168 **RESULTS**

169         A total of 16,318 hospitalized COVID-19 patients were reported to COVID-NET with an admission  
170 date during March 1–May 2, 2020. After excluding 101 pediatric patients, 74 patients from Iowa where  
171 detailed medical chart abstractions are not conducted, and 13,652 patients who were either still  
172 hospitalized or did not yet have completed medical chart abstractions, 2,491 (15%) COVID-19-associated  
173 hospitalized adults from 13 surveillance sites were included in this analysis (Figure 1). Patients came

174 from 43% (154/357) of the acute care hospitals included in COVID-NET surveillance across the 13  
175 surveillance sites (Appendix Table 2). The percentage of facilities contributing data out of the total  
176 number of facilities by site ranged from 19% to 100%. The median age of included and excluded  
177 patients (62 vs. 63 years, respectively) was similar (Appendix Table 3). The highest proportion of  
178 patients included in this analysis were from Minnesota (20%), Tennessee (20%), New York (12%), and  
179 Maryland (10%), and Connecticut (9%) (Appendix Table 3).

180

### 181 **Characteristics of hospitalized patients with COVID-19**

182 Among the 2,491 hospitalized adults, median age was 62 years (interquartile range (IQR), 50–  
183 75), and almost 75% were  $\geq 50$  years (Table 1). Forty-seven percent of patients (n=1178/2490) were  
184 non-Hispanic whites, 30% non-Hispanic blacks (n=755/2490), and 12% Hispanics (n=306/2490). Nearly  
185 one-third of patients were current or former smokers.

186 Almost all patients (n=2278/2489, 92%) had  $\geq 1$  underlying medical condition, with hypertension  
187 (n=1428/2488, 57%), obesity (n=1154/2332, 50%), and chronic metabolic disease (n=1024/2486,  
188 41%) most frequently documented. Among patients with chronic metabolic disease, 80% (n=819/1024)  
189 had diabetes mellitus; hypertension alone was documented in only 4% (n=91/2490) of patients.  
190 Seventeen percent (n=316/1892) took ACE-inhibitors, and 14% (n=257/1895) took ARBs prior to  
191 hospitalization. The proportion of patients with any documented underlying medical condition  
192 increased with age ( $p < 0.05$ ) (Figure 2A). Prevalence of CLD, neurologic conditions, obesity, and renal  
193 disease varied between males and females ( $p < 0.05$ , Figure 2B). CVD, CLD, and neurologic conditions  
194 were more prevalent among non-Hispanic whites, while diabetes, hypertension, obesity and renal  
195 disease were more common among non-Hispanic blacks ( $p < 0.05$ , Figure 2C).

196 Cough (75%), fever or chills (74%), and shortness of breath (70%) were commonly  
197 documented symptoms at admission (Table 2 and Appendix Table 4). Gastrointestinal symptoms,



198 including nausea, vomiting, and diarrhea, were documented in almost 30% of patients. Median length  
199 of hospitalization was 6 days (IQR, 3–11), and median days from symptom onset to hospital admission  
200 was 6 days (IQR, 3–8). Median values of initial vital signs were within normal range, except for elevated  
201 blood pressure (Table 2). Thirty-three individuals had a pathogen detected from positive blood cultures  
202 (Appendix Table 5). Viral co-detections from respiratory specimens were rare among those who were  
203 tested (n=38/1549, 2.5%) (Appendix Table 6). Among 1932 patients with chest radiograph  
204 performed, 92% (n=1769) were documented as abnormal with infiltrate or consolidation (n=1574/1932,  
205 81%) documented most frequently (Appendix Table 7). Ninety-five percent (n=540/566) of patients with  
206 chest computerized tomography (CT) had abnormal findings, and ground glass opacity  
207 was documented in 62% (n=350/566) (Appendix Table 7).

208           Forty-five percent (n=1125/2482) of patients received investigational medication regimens for  
209 COVID-19 during hospitalization (Table 2). The most common regimens included hydroxychloroquine  
210 (n=1065/2479, 43%) and the combination of azithromycin and  $\geq 1$  COVID-19 treatment (n=725/2479,  
211 29%) (non-mutually exclusive categories). The most frequent discharge diagnoses recorded in hospital  
212 discharge summaries were pneumonia (n=1395/2485, 56%), acute respiratory failure (n=999/2487,  
213 40%), acute renal failure (n=456/2,485, 18%), and sepsis (n=443/2,479, 18%).

214           Thirty-two percent (n=798/2490) of patients required ICU admission, with a median length of  
215 ICU stay of 6 days (range, 1-41; IQR, 2–11) (Table 2). Median days from symptom onset to ICU  
216 admission was 7 days (range, 0–25; IQR, 4–10), and median days from hospital admission to ICU  
217 admission was 1 day (range, 0–19; IQR, 0–2). Among 2,489 hospitalized patients, the highest respiratory  
218 support received was invasive mechanical ventilation in 19% (n=462), bilevel positive airway pressure  
219 (BIPAP) or continuous positive airway pressure (CPAP) in 3% (n=82), and high flow nasal cannula (HFNC)  
220 in 7% (n=170). Fifty-three percent (n=246/462) of patients that received invasive mechanical ventilation  
221 died in-hospital (median age, 71 years; IQR, 62–79); the proportion of patients receiving mechanical

222 ventilation who died increased with age ( $p < 0.0001$ ). Vasopressors were used in 15% ( $n = 373/2486$ ) of  
223 patients, while renal replacement therapy was used in 5% ( $n = 115/2487$ ). As age increased, so did  
224 the proportion of patients who required ICU admission, invasive mechanical ventilation, and  
225 vasopressors ( $p < 0.05$ , Figure 3A). Males were admitted to the ICU and treated with invasive mechanical  
226 ventilation, HFNC, or vasopressors more frequently than females ( $p < 0.05$ ) (Figure 3B). Non-Hispanic  
227 whites more frequently received BIPAP, CPAP or HFNC ( $p < 0.05$ , Figure 3C).

228 Overall, seventeen percent ( $n = 420/2490$ ) of patients died during hospitalization (Table 2). The  
229 proportion of patients who died increased with increasing age groups, ranging from 3% among 18–49  
230 years to 10% among 50–64 years to 29% among  $\geq 65$  years (Figure 3A). Males died more frequently  
231 compared to females ( $p < 0.05$ ) (Figure 3B), as did non-Hispanic whites compared to other  
232 race/ethnicities ( $p < 0.05$ , Figure 3C).

233 Among 420 patients who died, median age was 76 years (range, 24–97; IQR, 66–85); 58%  
234 ( $n = 244$ ) were male; 71% ( $n = 299$ ) were admitted to the ICU; and 59% ( $n = 246$ ) received invasive  
235 mechanical ventilation. The median length of hospitalization among patients who died was 7 days  
236 (range, 0–40; IQR, 4–12).

237

### 238 Risk factors for ICU admission and death

239 Factors independently associated with ICU admission included age 50–64 years (adjusted risk  
240 ratio (aRR) = 1.53; 95% confidence interval (CI), 1.28 to 1.83); 65–74 years (aRR = 1.65; CI, 1.34 to 2.03);  
241 75–84 years (aRR = 1.84; CI, 1.60 to 2.11);  $\geq 85$  years (aRR = 1.43; CI, 1.00 to 2.04); male sex (aRR = 1.34;  
242 CI, 1.20 to 1.50); obesity (aRR = 1.31; CI, 1.16 to 1.47); diabetes (aRR = 1.13; CI, 1.03 to 1.24); and  
243 immunosuppression (aRR = 1.29; CI, 1.13 to 1.47) (Table 3A).

244 Independent factors associated with in-hospital mortality included age 50–64 years (aRR = 3.11;  
245 CI 1.50 to 6.46); age 65–74 years (aRR = 5.77; CI, 2.64 to 12.64); age 75–84 years (aRR = 7.67; CI, 3.35 to

246 17.59); age  $\geq 85$  years (aRR = 10.98; CI, 5.09 to 23.69); male sex (aRR = 1.30; CI, 1.14 to 1.49); diabetes  
247 (aRR = 1.19; CI, 1.01 to 1.40); CLD (aRR = 1.31; CI, 1.13 to 1.52); CVD (aRR = 1.28; CI, 1.03 to 1.58);  
248 neurologic disorders (aRR = 1.25; CI, 1.04 to 1.50); renal disease (aRR = 1.33; CI, 1.10 to 1.61); and  
249 immunosuppression (aRR = 1.39; CI, 1.13 to 1.70) (Table 3B).

250 Having  $\geq 3$  underlying medical conditions was significantly associated with higher risk of  
251 ICU admission and death after adjusting for age group, sex, and race/ethnicity (Appendix Table 8).

252

## 253 **DISCUSSION**

254 Using a geographically diverse, multi-site, population-based U.S. surveillance system, we found  
255 that among adults hospitalized with laboratory-confirmed COVID-19, almost one-third required ICU  
256 admission, 19% received invasive mechanical ventilation, and 17% died during hospitalization. About  
257 75% of patients were  $\geq 50$  years, and  $>90\%$  had underlying medical conditions. Older age, being male,  
258 and the presence of certain underlying medical conditions were associated with a higher risk of ICU  
259 admission and in-hospital mortality. Race/ethnicity was not independently associated with either  
260 outcome among hospitalized patients. This information can alert healthcare providers to patients at  
261 greatest risk of severe outcomes and help target prevention strategies and future interventions.

262 In a published COVID-NET analysis, we found that when comparing the racial/ethnic distribution  
263 of residents of the surveillance catchment areas to the racial/ethnic distribution of COVID-19-associated  
264 hospitalizations, non-Hispanic blacks were disproportionately hospitalized with COVID-19 compared to  
265 non-Hispanic whites (10). In this analysis, however, we found that once hospitalized, non-Hispanic  
266 blacks did not have increased risk of poorer outcomes compared to other race/ethnicities after adjusting  
267 for age and underlying conditions. In a preprinted article of U.S. Veterans seeking care at VA Hospitals,  
268 Rentsch et al. found no association between black race and ICU admission (13). Similarly, a large study

269 of patients hospitalized in New York City did not find race/ethnicity to be associated with ICU admission  
270 or death (4).

271 COVID-19-associated hospitalizations, ICU admissions, and deaths have been shown to occur  
272 more frequently with increasing age (6, 9, 14). In our study, age  $\geq 65$  years was the strongest  
273 independent predictor of ICU admission and in-hospital mortality. Persons aged 75–84 years had the  
274 highest the risk of ICU admission compared to 18-49 years old, and those  $\geq 85$  years experienced 11  
275 times the risk of death. These findings are similar to other studies from China, Europe, and the United  
276 States (4, 9, 14-17). Our data provide support that older persons are particularly vulnerable to severe  
277 COVID-19 disease and should be targeted for aggressive preventive measures (8).

278 Being male was associated with a higher risk of ICU admission and death after adjusting for age,  
279 race/ethnicity and underlying conditions. Other studies have similarly shown male sex to be associated  
280 with COVID-19-associated hospitalizations (4, 18), ICU admissions (19), and need for mechanical  
281 ventilation (20).

282 Similar to other U.S. studies, we found that nearly all hospitalized patients with COVID-19 had at  
283 least one underlying medical condition (4). In contrast, underlying medical conditions were documented  
284 in only 25–50% of hospitalized cases from China (3, 21). Our analysis further demonstrated that a higher  
285 number of underlying medical conditions increased the risk of ICU admission (1.3 times the risk in  
286 persons with  $\geq 3$  vs. no underlying condition) and in-hospital mortality (1.8 times the risk in persons with  
287  $\geq 3$  vs. no underlying condition).

288 In a retrospective case study among 1590 laboratory-confirmed hospitalized COVID-19 cases in  
289 575 Chinese hospitals, Guan et al. found that after adjusting for age and smoking status, chronic  
290 obstructive pulmonary disease, diabetes, hypertension and malignancy were risk factors for a composite  
291 endpoint of ICU admission, invasive mechanical ventilation, and death (3). Similarly, we found an  
292 association between underlying medical conditions and severe outcomes, with diabetes, CLD, CVD,

293 neurologic disease, renal disease and immunosuppression associated with in-hospital death, and  
294 diabetes, obesity, and immunosuppression associated with ICU admission. While hypertension was  
295 highly prevalent in our patient population, it was not associated with ICU admission or death. Additional  
296 studies are needed to determine whether hypertension, which is also highly prevalent in the U.S.  
297 population, increases the risk of COVID-19-associated hospitalizations and whether the duration of  
298 hypertension and the degree to which it is controlled impact the risk for severe COVID-19 disease.  
299 Similarly, the associations between the duration and degree of glycemic control in diabetes and severity  
300 of COVID-19 disease require further investigation. Obesity, which was also highly prevalent in this  
301 cohort, imparted increased risk for ICU admission, but not death. This finding may, in part, be explained  
302 by a trend of decreasing obesity prevalence with increasing age, which was a strong risk factor for  
303 mortality. Healthcare providers should be aware of these findings to appropriately triage and manage  
304 patients with high-risk conditions that may either increase risk for hospitalization or poorer outcomes  
305 once hospitalized (22, 23).

306 We collected data on initial symptoms, vital signs and laboratory values to characterize disease  
307 severity at admission. While approximately 70% of patients had shortness of breath at admission, the  
308 median oxygen saturation at admission was 94% on room air. Other admission vital signs and laboratory  
309 values were also largely within normal ranges. Because we did not collect data on vital signs or  
310 laboratory values during the hospital course, we may not have fully captured the onset of clinical  
311 deterioration that has been reported during the second week after illness onset (24). We limited our  
312 analysis to patients that had either been discharged or died in-hospital and found that 15% of patients  
313 received vasopressor support, and 19% received invasive mechanical ventilation. Other U.S. studies  
314 have found that up to 32% of hospitalized patients have received vasopressors and 29–33% have  
315 received invasive mechanical ventilation (19, 20), though some of these studies included patients who  
316 were still hospitalized at the time of analysis. In our study, 53% of patients requiring mechanical

317 ventilation died, which is higher than the 36% reported in a recent study from New York City (4). In  
318 general, the proportion of patients with severe outcomes was higher in the United States than reported  
319 from China (6). Differences between patients' outcomes in the United States and China may reflect  
320 differences in clinical practices or varying thresholds for hospitalization (18). These proportions of  
321 severe outcomes among U.S. patients are also generally higher than those found in U.S. adults  
322 hospitalized with seasonal influenza (25, 26). Our findings may help to inform resource planning and  
323 allocation in healthcare facilities during the COVID-19 pandemic.

324         There are several limitations to our analysis. First, it is likely that not all COVID-19-associated  
325 hospitalizations were captured because of the lack of widespread testing capability during the study  
326 period and because identification of COVID-19 patients was largely reliant on clinician-directed testing.  
327 Second, clinical practices and availability of specific interventions may differ across hospitals, which  
328 might have influenced findings. Third, COVID-NET is an ongoing surveillance system, and only 15% of  
329 the 16,318 COVID-19 hospitalized patients were included, representing those who were discharged or  
330 died in-hospital during March 1–May 2, 2020 and for whom medical records were available and chart  
331 abstractions were completed. These restrictions may have resulted in selection bias. However, there  
332 was no difference in the age and sex distribution between cases included and excluded from the  
333 analysis. The geographic distribution of cases included versus excluded from this analysis differed,  
334 which may have impacted the racial and ethnic distribution of cases included in this analysis as  
335 compared to the racial and ethnic distribution of the surveillance catchment population; however, as we  
336 do not yet have complete data on race/ethnicity for all identified cases, we were not able to assess this  
337 further. Nevertheless, COVID-NET encompasses a large geographic area with multiple hospitals and  
338 likely offers a more racially and ethnically diverse patient population compared to other single-center or  
339 state-based studies. Lastly, small counts limited our ability to determine risk factors for severe  
340 outcomes among all racial and ethnic groups. COVID-NET data will become more robust as additional

341 medical chart reviews are completed and may allow further investigation within these racial and ethnic  
342 groups over time.

343           Based on preliminary findings from this multi-site, geographically diverse study, a high  
344 proportion of patients hospitalized with COVID-19 received aggressive interventions and had poor  
345 outcomes. Increasing age was the strongest predictor of in-hospital mortality. Prevention strategies,  
346 such as social distancing and rigorous hand hygiene, are key to minimizing the risk of infection in high-  
347 risk patients. These data help to characterize persons at highest risk for severe COVID-19-associated  
348 disease in the United States and to define target groups for future prevention and treatment strategies  
349 as they become available.

350

#### 351 **ACKNOWLEDGMENTS**

352 Ashley Coates, Pam Daily Kirley, Gretchen Rothrock, California Emerging Infections Program; Nisha  
353 Alden, Rachel Herlihy, Breanna Kawasaki, Colorado Department of Public Health and Environment; Paula  
354 Clogher, Hazal Kayalioglu, Amber Maslar, Adam Misorski, Danyel Olson, Christina Parisi, Connecticut  
355 Emerging Infections Program; Kyle Openo, Emily Fawcett, Jeremiah Williams, Katelyn Lengacher, Georgia  
356 Emerging Infections Program; Andrew Weigel, Iowa Department of Health; Brian Bachaus, Timothy  
357 Blood, David Blythe, Alicia Brooks, Judie Hyun, Elisabeth Vaeth, Cindy Zerrlaut, Maryland Department of  
358 Health; Jim Collins, Kimberly Fox, Sam Hawkins, Justin Henderson, Shannon Johnson, Libby Reeg,  
359 Michigan Department of Health and Human Services; Austin Bell, Kayla Bilski, Erica Bye, Emma  
360 Contestabile, Richard Danila, Kristen Ehresmann, Hannah Friedlander, Claire Henrichsen, Emily  
361 Holodnick, Ruth Lynfield, Katherine Schliess, Samantha Siebman, Kirk Smith, Maureen Sullivan,  
362 Minnesota Department of Health; Cory Cline, New Mexico Department of Health; Kathy Angeles, Lisa  
363 Butler, Emily Hancock, Sarah Khanlian, Meaghan Novi, Sarah Shrum, New Mexico Emerging Infections  
364 Program Albuquerque; Nancy Spina, Grant Barney, Suzanne McGuire, New York State Health

365 Department; Sophrena Bushey, Christina Felsen, Maria Gaitan, Anita Gellert, RaeAnne Kurtz, Christine  
366 Long, Shantel Peters, Marissa Tracy, University of Rochester School of Medicine and Dentistry; Laurie  
367 Billing, Maya Scullin, Jessica Shiltz, Ohio Department of Health; Nicole West, Oregon Health Authority;  
368 Kathy Billings, Katie Dyer, Anise Elie, Karen Leib, Tiffanie Markus, Terri McMinn, Danielle Ndi,  
369 Manideepthi Pemmaraju, Vanderbilt University Medical Center; Keegan McCaffrey, Utah Department of  
370 Health; Clarissa Aquino, Ryan Chatelain, Andrea George, Jacob Ortega, Andrea Price, Ilene Risk, Melanie  
371 Spencer, Ashley Swain, Salt Lake County Health Department; Mimi Huynh, Monica Schroeder, Council of  
372 State and Territorial Epidemiologists; Shua J. Chai, Field Services Branch, Division of State and Local  
373 Readiness, Center for Preparedness and Response, Centers for Disease Control and Prevention; Sharad  
374 Aggarwal, Lanson Broecker, Aaron Curns, Rebecca M. Dahl, Alexandra Ganim, Rainy Henry, Sang Kang,  
375 Sonja Nti-Berko, Robert Pinner, Mila Prill, Scott Santibanez, Alvin Shultz, Sheng-Te Tsai, Henry Walke,  
376 Venkata Akesh R. Vundi, CDC.

377

## 378 REFERENCES

- 379 1. Johns Hopkins University & Medicine 2020;Pages<https://coronavirus.jhu.edu/map.html> on  
380 5/15/2020.
- 381 2. Centers for Disease Control & Prevention 2020;Pages<https://www.cdc.gov/coronavirus/2019-ncov/covid-data/covidview/index.html#outpatient> on 5/15/20220 2020.
- 382
- 383 3. Guan WJ, Liang WH, Zhao Y, Liang HR, Chen ZS, Li YM, et al. Comorbidity and its impact on 1590  
384 patients with Covid-19 in China: A Nationwide Analysis. *Eur Respir J.* 2020.
- 385 4. Petrilli C, Jones S, Yang J, Rajagopalan H, O'Donnell L, Chernyak Y, et al. Factors associated with  
386 hospitalization and critical illness among 4,103 patients with COVID-19 disease in New York City.  
387 2020.
- 388 5. COVID-19 Surveillance Group. Characteristics of COVID-19 patients dying in Italy: report based  
389 on available data on March 20th, 2020. Rome, Italy: Istituto Superiore Di Sanita; 2020.
- 390 6. Guan WJ, Ni ZY, Hu Y, Liang WH, Ou CQ, He JX, et al. Clinical Characteristics of Coronavirus  
391 Disease 2019 in China. *N Engl J Med.* 2020.
- 392 7. Bhatraju PK, Ghassemieh BJ, Nichols M, Kim R, Jerome KR, Nalla AK, et al. Covid-19 in Critically Ill  
393 Patients in the Seattle Region - Case Series. *N Engl J Med.* 2020.
- 394 8. Team CC-R. Preliminary Estimates of the Prevalence of Selected Underlying Health Conditions  
395 Among Patients with Coronavirus Disease 2019 - United States, February 12-March 28, 2020.  
396 *MMWR Morb Mortal Wkly Rep.* 2020;69(13):382-6.
- 397 9. Team CC-R. Severe Outcomes Among Patients with Coronavirus Disease 2019 (COVID-19) -  
398 United States, February 12-March 16, 2020. *MMWR Morb Mortal Wkly Rep.* 2020;69(12):343-6.



- 399 10. Garg S, Kim L, Whitaker M, O'Halloran A, Cummings C, Holstein R, et al. Hospitalization Rates  
400 and Characteristics of Patients Hospitalized with Laboratory-Confirmed Coronavirus Disease  
401 2019 - COVID-NET, 14 States, March 1-30, 2020. *MMWR Morb Mortal Wkly Rep.*  
402 2020;69(15):458-64.
- 403 11. Liang K-Y, Zeger SL. Longitudinal Data Analysis Using Generalized Linear Models.
- 404 12. Hoogendoorn WE, Bongers PM, de Vet HC, Twisk JW, van Mechelen W, Bouter LM. Comparison  
405 of two different approaches for the analysis of data from a prospective cohort study: an  
406 application to work related risk factors for low back pain. *Occup Environ Med.* 2002;59(7):459-  
407 65.
- 408 13. Rentsch C, Kidwai-Khan F, Tate J, Park L, King Jr. J, Skanderson M, et al. Covid-19 Testing,  
409 Hospital Admission, and Intensive Care Among 2,026,227 United States Veterans Aged 54-75  
410 Years. 2020.
- 411 14. Chen T, Wu D, Chen H, Yan W, Yang D, Chen G, et al. Clinical characteristics of 113 deceased  
412 patients with coronavirus disease 2019: retrospective study. *BMJ.* 2020;368:m1091.
- 413 15. Zhou F, Yu T, Du R, Fan G, Liu Y, Liu Z, et al. Clinical course and risk factors for mortality of adult  
414 inpatients with COVID-19 in Wuhan, China: a retrospective cohort study. *Lancet.*  
415 2020;395(10229):1054-62.
- 416 16. Onder G, Rezza G, Brusaferro S. Case-Fatality Rate and Characteristics of Patients Dying in  
417 Relation to COVID-19 in Italy. *JAMA.* 2020.
- 418 17. Wu C, Chen X, Cai Y, Xia Ja, Zhou X, Xu S, et al. Risk Factors Associated With Acute Respiratory  
419 Distress Syndrome and Death in Patients With Coronavirus Disease 2019 Pneumonia in Wuhan,  
420 China. *JAMA Internal Medicine.* 2020.
- 421 18. Richardson S, Hirsch JS, Narasimhan M, Crawford JM, McGinn T, Davidson KW, et al. Presenting  
422 Characteristics, Comorbidities, and Outcomes Among 5700 Patients Hospitalized With COVID-19  
423 in the New York City Area. *JAMA.* 2020.
- 424 19. Myers LC, Parodi SM, Escobar GJ, Liu VX. Characteristics of Hospitalized Adults With COVID-19 in  
425 an Integrated Health Care System in California. *JAMA.* 2020.
- 426 20. Goyal P, Choi JJ, Pinheiro LC, Schenck EJ, Chen R, Jabri A, et al. Clinical Characteristics of Covid-19  
427 in New York City. *N Engl J Med.* 2020.
- 428 21. Chen N, Zhou M, Dong X, Qu J, Gong F, Han Y, et al. Epidemiological and clinical characteristics  
429 of 99 cases of 2019 novel coronavirus pneumonia in Wuhan, China: a descriptive study. *Lancet.*  
430 2020;395(10223):507-13.
- 431 22. Centers for Disease Control & Prevention 2020;Pages[https://www.cdc.gov/coronavirus/2019-  
432 ncov/hcp/underlying-conditions.html](https://www.cdc.gov/coronavirus/2019-ncov/hcp/underlying-conditions.html).
- 433 23. Centers for Disease Control & Prevention 2020;Pages[https://www.cdc.gov/coronavirus/2019-  
434 ncov/need-extra-precautions/groups-at-higher-risk.html](https://www.cdc.gov/coronavirus/2019-ncov/need-extra-precautions/groups-at-higher-risk.html).
- 435 24. Kujawski SA, Wong KK, Collins JP, Epstein L, Killerby ME, Midgley CM, et al. Clinical and virologic  
436 characteristics of the first 12 patients with coronavirus disease 2019 (COVID-19) in the United  
437 States. *Nature Medicine.* 2020.
- 438 25. Centers for Disease Control & Prevention  
439 2020;Pages<https://gis.cdc.gov/grasp/fluview/FluHospChars.html>.
- 440 26. Arriola C, Garg S, Anderson EJ, Ryan PA, George A, Zansky SM, et al. Influenza Vaccination  
441 Modifies Disease Severity Among Community-dwelling Adults Hospitalized With Influenza. *Clin  
442 Infect Dis.* 2017;65(8):1289-97.  
443

**Figure 1. Flow diagram of analytic sample.**

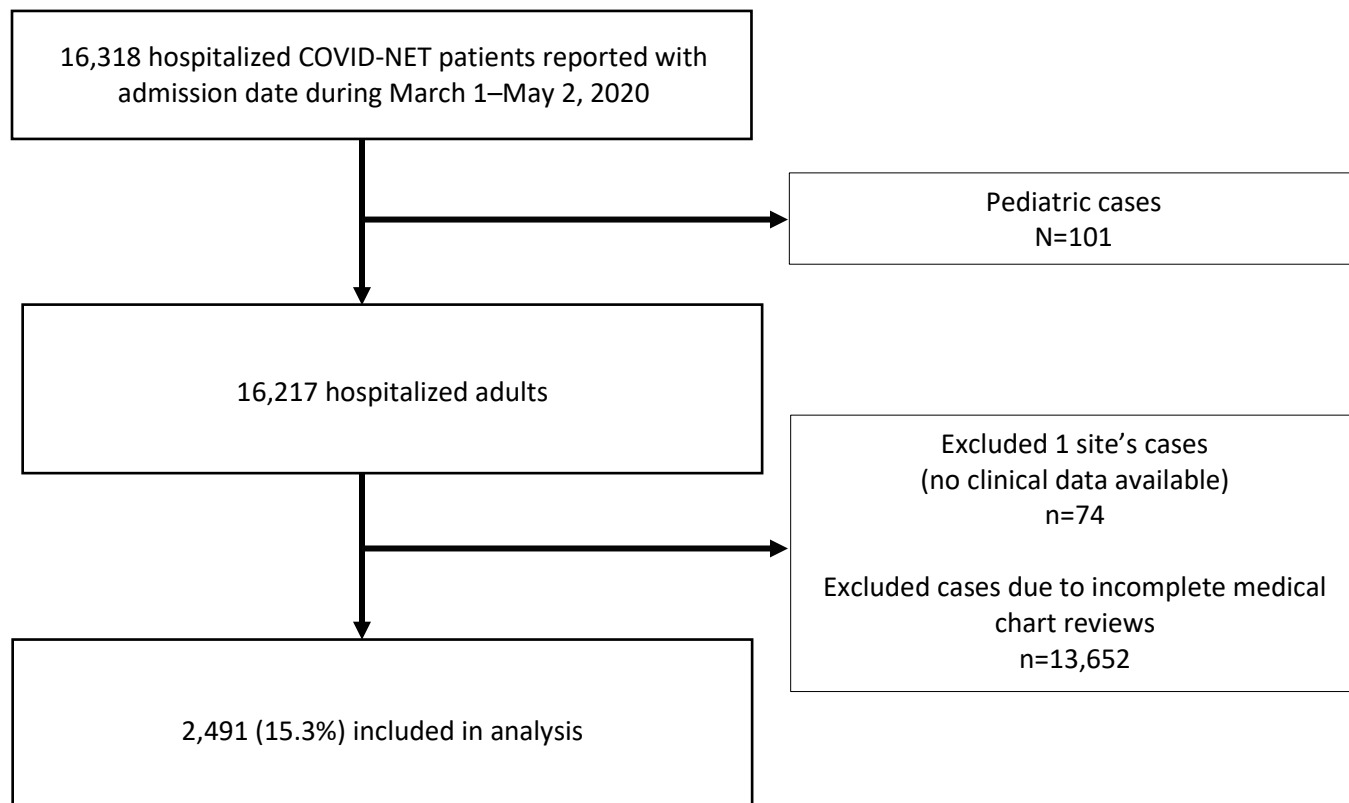

**Table 1. Demographic and clinical characteristics of adults hospitalized with COVID-19 — COVID-NET, 13 sites (N=2,491)**

|                                                       | n, %         |
|-------------------------------------------------------|--------------|
| <b>Age in years (median, IQR)</b>                     | 62, 50–75    |
| <b>Age category</b>                                   |              |
| 18–39                                                 | 302 (12.1)   |
| 40–49                                                 | 319 (12.8)   |
| 50–64                                                 | 744 (29.9)   |
| 65–74                                                 | 478 (19.2)   |
| 75–84                                                 | 397 (15.9)   |
| 85+                                                   | 251 (10.1)   |
| <b>Male</b>                                           | 1,326 (53.2) |
| <b>Race/ethnicity (n=2,490)</b>                       |              |
| Non-Hispanic White                                    | 1,178 (47.3) |
| Non-Hispanic Black                                    | 755 (30.3)   |
| Hispanic                                              | 306 (12.3)   |
| Non-Hispanic Other*                                   | 158 (6.3)    |
| Unknown                                               | 93 (3.7)     |
| <b>Residence at time of hospitalization (n=2,482)</b> |              |
| Private residence                                     | 1,899 (76.5) |
| Facility <sup>†</sup>                                 | 495 (19.9)   |
| Homeless/Shelter                                      | 40 (1.6)     |
| Other <sup>‡</sup>                                    | 45 (1.8)     |
| Unknown                                               | 3 (0.1)      |
| <b>Smoker (n=2,489)</b>                               |              |
| Current                                               | 150 (6.0)    |
| Former                                                | 642(25.8)    |
| No or Unknown                                         | 1,697 (68.2) |
| <b>Any underlying condition<sup>§</sup> (n=2,489)</b> | 2,278 (91.5) |
| Hypertension (n=2,488)                                | 1,428 (57.4) |
| Obesity <sup>  </sup> (n=2,332)                       | 1154 (49.7)  |
| Severe obesity <sup>  </sup> (n=2,332)                | 325 (14.0)   |
| Chronic metabolic disease (n=2,486)                   | 1,024 (41.2) |
| Diabetes mellitus (n=2,486)                           | 819 (32.9)   |
| Chronic lung disease (n=2,484)                        | 747 (30.1)   |
| Asthma (n=2,484)                                      | 314 (12.6)   |
| Chronic Obstructive Pulmonary Disease (n=2,484)       | 266 (10.7)   |
| Cardiovascular disease (n=2,486)                      | 859 (34.6)   |
| Coronary artery disease (n=2,486) <sup>¶</sup>        | 352 (14.2)   |
| Congestive heart failure (n=2,486)                    | 284 (11.4)   |
| Neurologic disease (n=2,484)                          | 548 (22.1)   |
| Renal disease (n=2,488)                               | 386 (15.5)   |
| Immunosuppressive condition (n=2,487)                 | 263 (10.6)   |
| Gastrointestinal or Liver disease (n=2,486)           | 118 (4.7)    |
| Hematologic condition (n=2,483)                       | 80 (3.2)     |
| Rheumatologic or autoimmune disease (n=2,486)         | 77 (3.1)     |

|                                                                              |              |
|------------------------------------------------------------------------------|--------------|
| Pregnancy (n=279)**                                                          | 36 (12.9)    |
| <b>Number of underlying medical conditions (by major category) (n=2,490)</b> |              |
| 0                                                                            | 212 (8.5)    |
| 1                                                                            | 480 (19.3)   |
| 2                                                                            | 510 (20.5)   |
| 3+                                                                           | 1,288 (51.7) |
| <b>Outpatient use of medications</b>                                         |              |
| ACE-inhibitor (n=1,892)                                                      | 316 (16.7)   |
| Angiotensin receptor blockers (ARBs) (n=1,895)                               | 257 (13.6)   |

IQR = interquartile range; ACE = angiotensin-converting enzyme inhibitors

\*Non-Hispanic Other includes: Non-Hispanic American Indian or Alaskan Native (n=24), Non-Hispanic Asian (n=128), and Non-Hispanic multiracial (n=6)

†Facility includes rehabilitation facilities, assisted living/residential care, group homes, nursing homes, skilled nursing facilities, long-term care facilities, long-term acute care hospitals, alcohol/drug treatment centers, and psychiatric facilities.

‡Other includes home with services (n=43), correctional facility (n=1), and hospice (n=1).

§See Supplementary Table 1 for definitions of underlying medical conditions.

||Obesity is defined as body mass index (BMI)  $\geq 30$  kg/m<sup>2</sup>, and severe obesity is defined as BMI  $\geq 40$  kg/m<sup>2</sup>.

¶Includes coronary artery disease, history of coronary artery bypass grafting, and history of myocardial infarction

\*\*Denominator includes women aged 15–49 years.

**Figure 2. Select underlying medical conditions\* of adults hospitalized with COVID-19, by age, sex, and race/ethnicity — COVID-NET, 13 sites (N=2,491)**

**A. Age (n=2,489)**

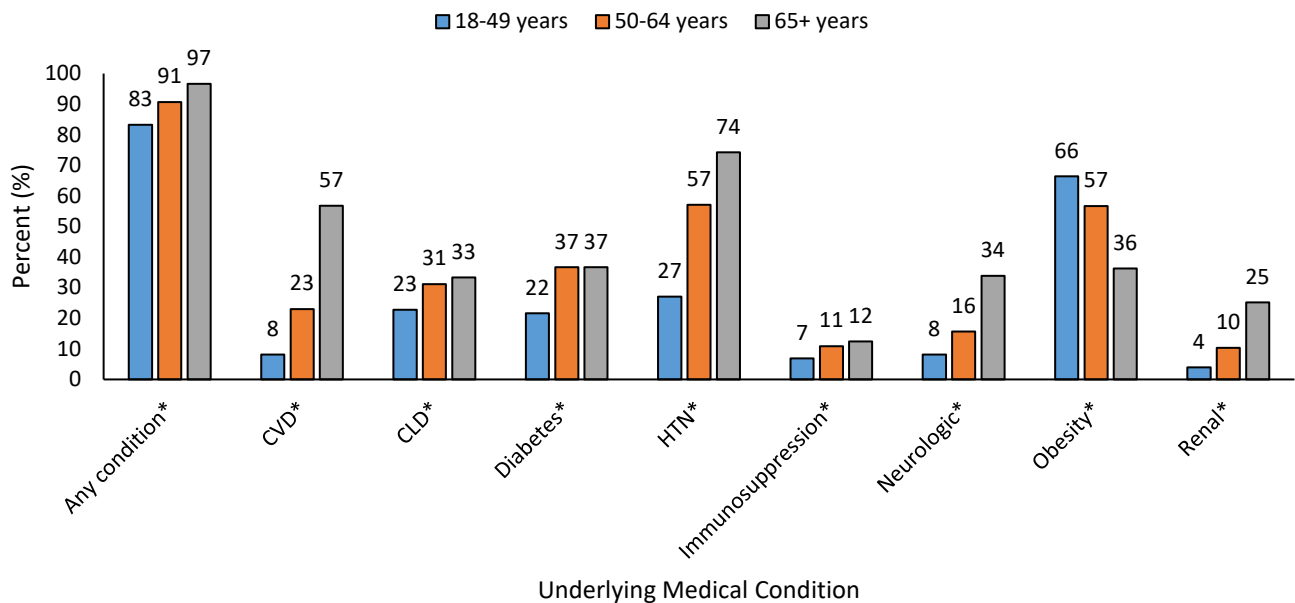

\*p-value < 0.05

CVD = Cardiovascular disease (excluding hypertension); HTN = hypertension; CLD = chronic lung disease.

**B. Sex (n=2,489)**

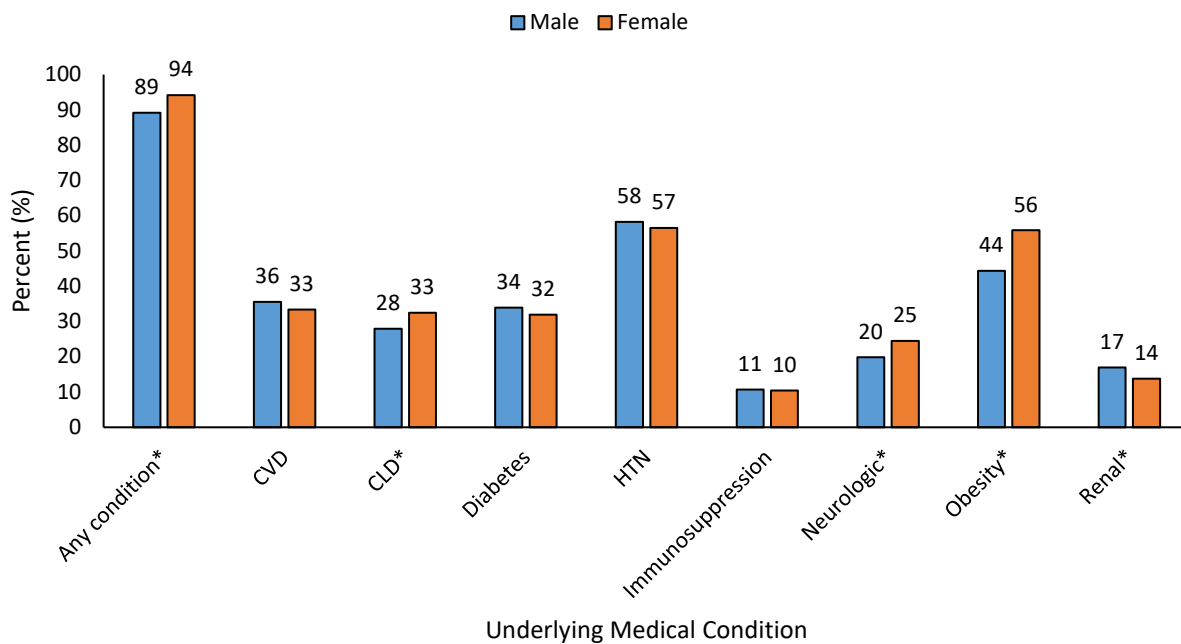

\*p-value < 0.05

CVD = Cardiovascular disease (excluding hypertension); HTN = hypertension; CLD = chronic lung disease.

### C. Race/Ethnicity (n=2,488)

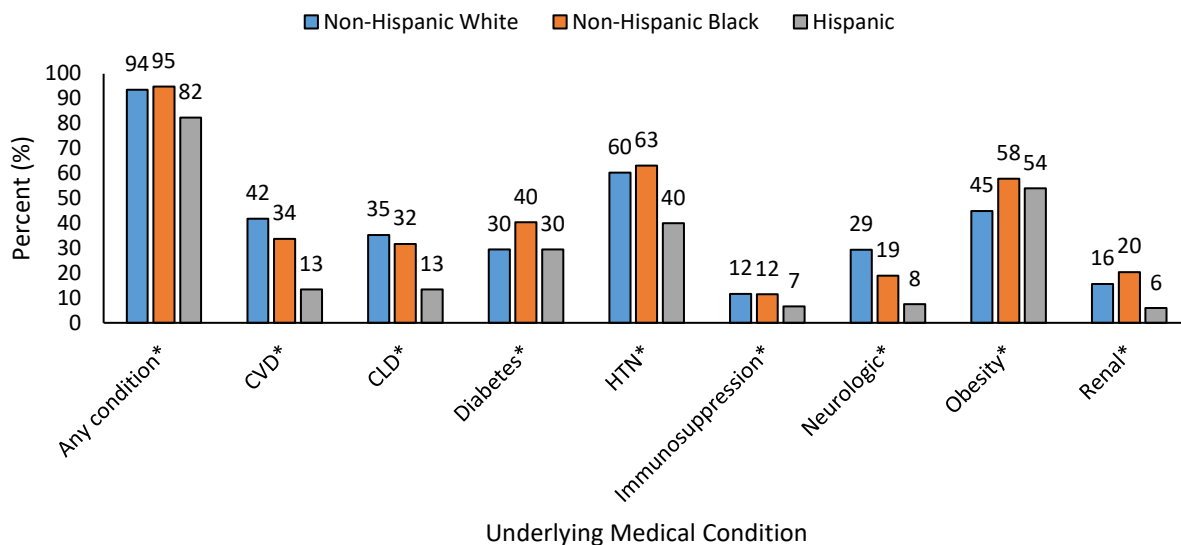

\*p-value <0.05

CVD = Cardiovascular disease (excluding hypertension); HTN = hypertension; CLD = chronic lung disease.

\*The underlying medical condition categories are not mutually exclusive. Patients can have more than once underlying medical condition.

**Table 2. Clinical course, interventions, and outcomes of adults hospitalized with COVID-19 — COVID-NET, 13 sites (N=2,491)**

|                                                                           | %                   |
|---------------------------------------------------------------------------|---------------------|
| <b>Symptoms on admission* (n=2,482)</b>                                   |                     |
| Cough                                                                     | 1,855 (74.7)        |
| Fever or chills                                                           | 1,835 (73.9)        |
| Shortness of breath                                                       | 1,740 (70.1)        |
| Muscle aches/myalgias                                                     | 722 (29.1)          |
| Diarrhea                                                                  | 676 (27.2)          |
| Nausea or vomiting                                                        | 621 (25.0)          |
| <b>Hospitalization length of stay in days, median (IQR) (n=2,487)</b>     | 6 (3–11)            |
| <b>Days from symptom onset to hospitalization (median, IQR) (n=1,937)</b> | 6 (3–8)             |
| <b>Initial vital signs</b>                                                |                     |
| Temperature (°Celsius, median, IQR) (n=2,469)                             | 37.4 (36.9–38.1)    |
| Heart rate (median, IQR) (n=2,479)                                        | 95 (83–108)         |
| Systolic blood pressure (median, IQR) (n=2,483)                           | 132 (118–147)       |
| Respiratory rate (median, IQR) (n=2,461)                                  | 20 (18–23)          |
| Oxygen saturation (among those on room air) (median, IQR) (n=1,969)       | 94 (92–97)          |
| <b>Initial laboratory values</b>                                          |                     |
| White blood cell count (median, IQR) – per mm <sup>3</sup> (n=2,458)      | 6.3 (4.7–8.5)       |
| Hematocrit (median, IQR) - % (n=2,461)                                    | 40.6 (36.9–43.9)    |
| Platelet count (median, IQR) – per mm <sup>3</sup> (n=2,461)              | 195.0 (156.0–249.0) |
| Sodium (median, IQR) – mmol/L (n=2,460)                                   | 137.0 (134.0–139.0) |
| Blood Urea Nitrogen (median, IQR) – mg/dl (n=2,443)                       | 16.0 (11.0–25.0)    |
| Creatinine (median, IQR) – mg/dl (n=2,462)                                | 1.0 (0.8–1.4)       |
| Glucose (median, IQR) – mg/dl (n=2,459)                                   | 117.0 (102.0–149.0) |
| Aspartate transaminase (median, IQR) – U/L (n=2,149)                      | 40.0 (28.0–61.0)    |
| Alanine aminotransferase (median, IQR) – U/L (n=2,164)                    | 31.0 (20.0–50.0)    |
| Arterial pH (median, IQR) (n=487)                                         | 7.35 (7.40–7.45)    |
| <b>Abnormal chest X-ray during hospitalization (n=1,932)</b>              | 1,769 (91.6)        |
| <b>Abnormal chest CT during hospitalization (n=566)</b>                   | 540 (95.4)          |
| Ground glass opacities (n=566)                                            | 350 (61.8)          |
| <b>Investigational medication regimens for COVID-19† (n=2,482)</b>        | 1,125 (45.3)        |
| Hydroxychloroquine‡ (n=2,479)                                             | 1,065 (43.0)        |
| Azithromycin + ≥ 1 other COVID-19 treatment (n=2,479)                     | 725 (29.2)          |
| Tocilizumab (n=2,479)                                                     | 103 (4.2)           |
| Atazanavir (n=2,479)§                                                     | 94 (3.8)            |
| Remdesivir (n=2,479)†                                                     | 53 (2.1)            |
| Lopinavir/ritonavir (n=2,479)§                                            | 27 (1.1)            |
| Convalescent plasma (n=2,479)                                             | 9 (0.4)             |
| Chloroquine (n=2,479)                                                     | 7 (0.3)             |
| Sarilumab (n=2,479)†                                                      | 6 (0.2)             |
| Investigational drug (not specified) RCT (n=2,479)                        | 1 (0.0)             |

|                                                                |              |
|----------------------------------------------------------------|--------------|
| <b>ICU Admission (n=2,490)</b>                                 | 798 (32.0)   |
| ICU length of stay (days, median, IQR) (n=771)                 | 6 (2–11)     |
| <b>Highest level of respiratory support required (n=2,489)</b> |              |
| Invasive mechanical ventilation                                | 462 (18.6)   |
| BIPAP or CPAP                                                  | 82 (3.3)     |
| High flow nasal cannula                                        | 170 (6.8)    |
| <b>ECMO (n=2,487)</b>                                          | 9 (0.4)      |
| <b>Vasopressor use (n=2,486)</b>                               | 373 (15.0)   |
| <b>Systemic steroids (n=2,489)</b>                             | 321 (12.9)   |
| <b>Renal replacement therapy (n=2,487)</b>                     | 115 (4.6)    |
| <b>Discharge Diagnoses<sup>  </sup></b>                        |              |
| Pneumonia (n=2,485)                                            | 1,395 (56.1) |
| Acute respiratory failure (n=2,487)                            | 999 (40.2)   |
| Acute renal failure (n=2,485)                                  | 456 (18.4)   |
| Sepsis (n=2,479)                                               | 443 (17.9)   |
| Acute respiratory distress syndrome (n=2,485)                  | 255 (10.3)   |
| Encephalitis (n=2,482)                                         | 151 (6.1)    |
| Congestive heart failure (n=2,485)                             | 51 (2.1)     |
| Asthma exacerbation (n=2,486)                                  | 43 (1.7)     |
| COPD exacerbation (n=2,486)                                    | 39 (1.6)     |
| Acute myocardial infarction (n=2,485)                          | 38 (1.5)     |
| <b>In-hospital death (n=2,490)</b>                             | 420 (16.9)   |

IQR = interquartile range; CT = computed tomography; ICU = intensive care unit; BIPAP = bilevel positive airway pressure; CPAP = continuous positive airway pressure; ECMO = extracorporeal membrane oxygenation; COPD = chronic obstructive pulmonary disease

\*See Supplementary Table 2 for additional symptom data.

†Not mutually exclusive categories

\*Includes randomized controlled trials where it cannot be determined whether the case received treatment vs. placebo (remdesivir, 24; hydroxychloroquine 15; and sarilumab 5).

§Persons with HIV/AIDS were excluded.

||Discharge diagnoses recorded from the hospital discharge summary and not based on ICD-10 discharge codes.



**Figure 3. Interventions and outcomes of adults hospitalized with COVID-19, by age, sex, and race/ethnicity — COVID-NET, 13 sites (N=2,491)**

**A. Age (n=2,490)**

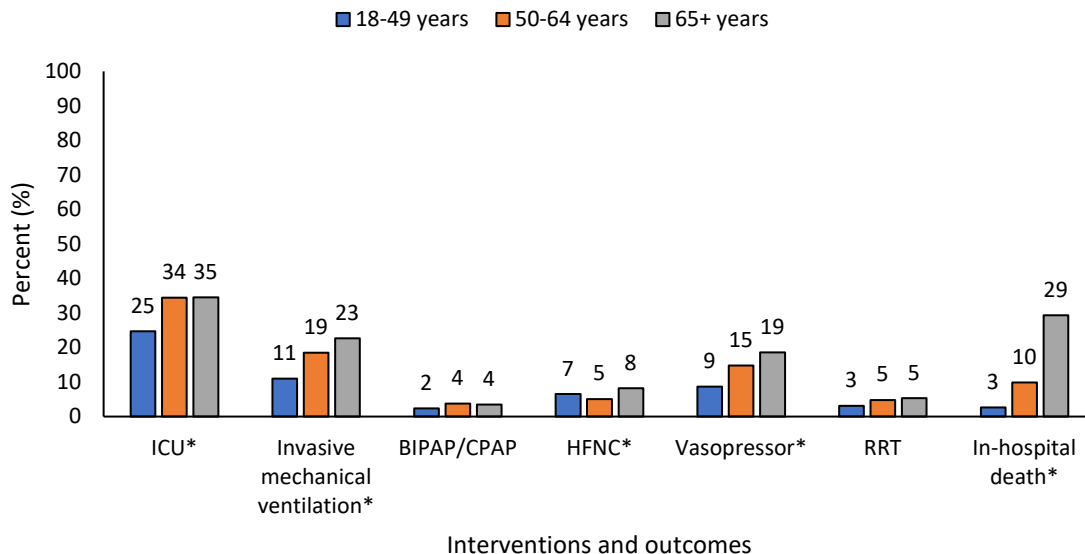

\*p-value < 0.05

ICU = intensive care unit; BIPAP = bilevel positive airway pressure; CPAP = continuous positive airway pressure; HFNC = high flow nasal cannula; RRT = renal replacement therapy

**B. Sex (n=2,490)**

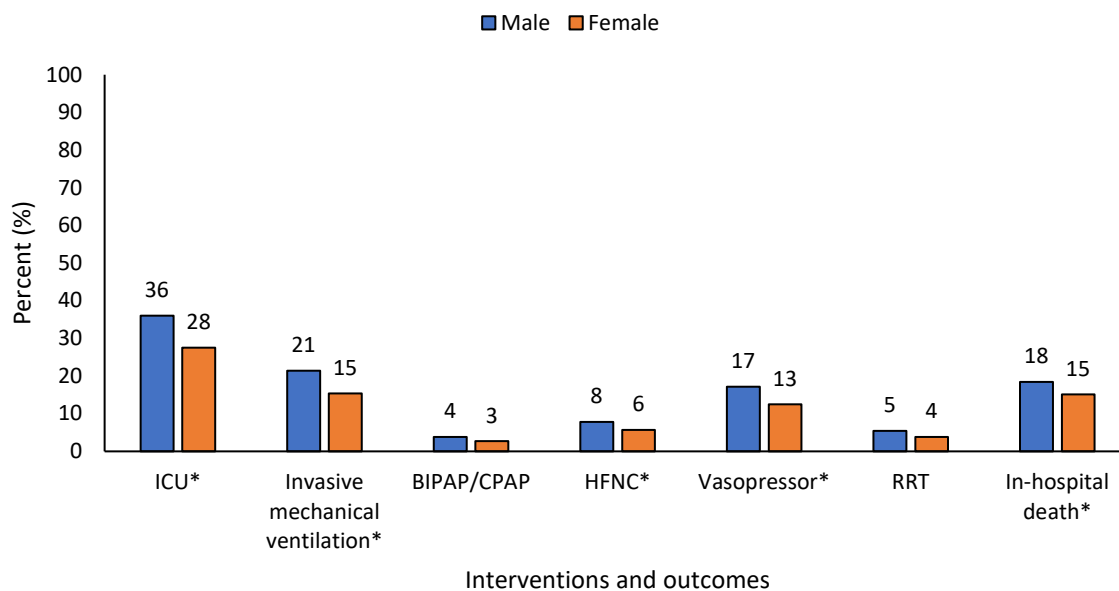

ICU = intensive care unit; BIPAP = bilevel positive airway pressure; CPAP = continuous positive airway pressure; HFNC = high flow nasal cannula; RRT = renal replacement therapy

### C. Race/Ethnicity (n=2,490)

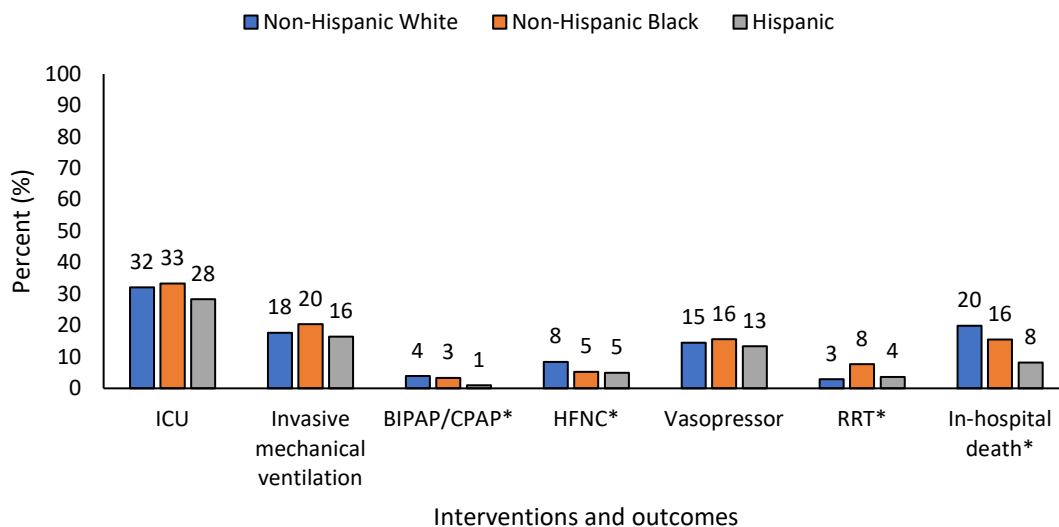

\*p-value <0.05

ICU = intensive care unit; BIPAP = bilevel positive airway pressure; CPAP = continuous positive airway pressure; HFNC = high flow nasal cannula; RRT = renal replacement therapy

\* For mechanical ventilation, BIPAP/CPAP, and HFNC, patients are assigned based on the highest level of respiratory support required during hospitalization (i.e. invasive mechanical ventilation followed by BIPAP or CPAP, followed by high flow nasal cannula).

**Table 3. Risk factors for ICU admission and in-hospital mortality — COVID-NET, 13 sites (N=2,491)**

**A. ICU Admission (N=2,490)\***

| Characteristic              | Category    | Not in ICU<br>(n=1,692) | In ICU<br>(n=798) | Total<br>(N=2,490) | P-value | Unadjusted<br>Risk Ratio | 95% CI       | Adjusted<br>Risk Ratio | 95% CI                    |
|-----------------------------|-------------|-------------------------|-------------------|--------------------|---------|--------------------------|--------------|------------------------|---------------------------|
| <b>Age category</b>         |             |                         |                   |                    | <0.0001 |                          |              |                        |                           |
|                             | 18–39 years | 240 (14)                | 62 (8)            | 302                |         | Reference                | N/A          | Reference              | N/A                       |
|                             | 40–49 years | 227 (13)                | 91 (11)           | 318                |         | 1.38                     | (1.08, 1.75) | 1.22                   | (0.96, 1.56)              |
|                             | 50–64 years | 488 (29)                | 256 (32)          | 744                |         | 1.64                     | (1.36, 1.99) | 1.53                   | (1.28, 1.83)              |
|                             | 65–74 years | 298 (18)                | 180 (23)          | 478                |         | 1.80                     | (1.50, 2.16) | 1.65                   | (1.34, 2.03)              |
|                             | 75–84 years | 248 (15)                | 149 (19)          | 397                |         | 1.80                     | (1.52, 2.14) | 1.84                   | (1.6, 2.11)               |
|                             | 85+ years   | 191 (11)                | 60 (8)            | 251                |         | 1.16                     | (0.87, 1.54) | 1.43                   | (1.00, 2.04) <sup>†</sup> |
| <b>Sex</b>                  |             |                         |                   |                    | <0.0001 |                          |              |                        |                           |
|                             | Female      | 844 (50)                | 320 (40)          | 1164               |         | Reference                | N/A          | Reference              | N/A                       |
|                             | Male        | 848 (50)                | 478 (60)          | 1326               |         | 1.30                     | (1.20, 1.42) | 1.34                   | (1.20, 1.50)              |
| <b>Race/ethnicity</b>       |             |                         |                   |                    | 0.63    |                          |              |                        |                           |
|                             | NH White    | 800 (47)                | 378 (47)          | 1178               |         | Reference                |              | Reference              | N/A                       |
|                             | NH Black    | 503 (30)                | 251 (31)          | 754                |         | 1.03                     | (0.93, 1.13) | 1.01                   | (0.89, 1.15)              |
|                             | Hispanic    | 219 (13)                | 87 (11)           | 306                |         | 0.86                     | (0.69, 1.09) | 0.96                   | (0.76, 1.21)              |
|                             | NH Other    | 105 (6)                 | 53 (7)            | 158                |         | 1.03                     | (0.89, 1.18) | 1.06                   | (0.83, 1.37)              |
|                             | Unknown     | 64 (4)                  | 29 (4)            | 93                 |         | 0.97                     | (0.77, 1.22) | 0.93                   | (0.74, 1.15)              |
| <b>Smoker</b>               |             |                         |                   |                    | 0.0001  |                          |              |                        |                           |
|                             | No/Unknown  | 1185 (70)               | 512 (64)          | 1697               |         | Reference                |              | Reference              | N/A                       |
|                             | Former      | 395 (23)                | 247 (31)          | 642                |         | 1.26                     | (1.10, 1.43) | 1.07                   | (0.92, 1.24)              |
|                             | Current     | 112 (7)                 | 38 (5)            | 150                |         | 0.84                     | (0.67, 1.06) | 0.81                   | (0.61, 1.06)              |
| <b>Hypertension</b>         |             |                         |                   |                    | 0.03    |                          |              |                        |                           |
|                             | No          | 746 (44)                | 314 (39)          | 1060               |         | Reference                |              | Reference              | N/A                       |
|                             | Yes         | 945 (56)                | 483 (61)          | 1428               |         | 1.13                     | (1.01, 1.27) | 0.92                   | (0.79, 1.07)              |
| <b>Obesity<br/>(BMI≥30)</b> |             |                         |                   |                    | 0.0013  |                          |              |                        |                           |
|                             | No          | 821 (53)                | 347 (46)          | 1168               |         | Reference                | N/A          | Reference              | N/A                       |
|                             | Yes         | 739 (47)                | 415 (54)          | 1154               |         | 1.25                     | (1.14, 1.37) | 1.31                   | (1.16, 1.47)              |

|                                     |            |           |          |      |         |           |              |           |                           |
|-------------------------------------|------------|-----------|----------|------|---------|-----------|--------------|-----------|---------------------------|
| <b>Diabetes</b>                     |            |           |          |      | <0.0001 |           |              |           |                           |
|                                     | No         | 1176 (70) | 491 (62) | 1667 |         | Reference | N/A          | Reference | N/A                       |
|                                     | Yes        | 513 (30)  | 306 (38) | 819  |         | 1.20      | (1.08, 1.34) | 1.13      | (1.03, 1.24)              |
| <b>Chronic Lung Disease</b>         |            |           |          |      | <0.0001 |           |              |           |                           |
|                                     | No         | 1222 (72) | 515 (65) | 1737 |         | Reference | N/A          | Reference | N/A                       |
|                                     | Yes        | 466 (28)  | 281 (35) | 747  |         | 1.25      | (1.09, 1.44) | 1.17      | (1.00, 1.37) <sup>‡</sup> |
| <b>Cardiovascular Disease</b>       |            |           |          |      | 0.006   |           |              |           |                           |
|                                     | No         | 1136 (67) | 491 (62) | 1627 |         | Reference | N/A          | Reference | N/A                       |
|                                     | Yes        | 553 (33)  | 306 (38) | 859  |         | 1.17      | (1.09, 1.26) | 0.98      | (0.88, 1.09)              |
| <b>Neurologic</b>                   |            |           |          |      | 0.06    |           |              |           |                           |
|                                     | No         | 1297 (77) | 639 (80) | 1936 |         | Reference | N/A          | Reference | N/A                       |
|                                     | Yes        | 390 (23)  | 158 (20) | 548  |         | 0.88      | (0.76, 1.03) | 0.85      | (0.70, 1.04)              |
| <b>Renal</b>                        |            |           |          |      | 0.004   |           |              |           |                           |
|                                     | No         | 1453 (86) | 649 (81) | 2102 |         | Reference | N/A          | Reference | N/A                       |
|                                     | Yes        | 238 (14)  | 148 (19) | 386  |         | 1.23      | (1.11, 1.37) | 1.05      | (0.94, 1.16)              |
| <b>Immuno-suppression</b>           |            |           |          |      | <0.0001 |           |              |           |                           |
|                                     | No         | 1541 (91) | 683 (86) | 2224 |         | Reference | N/A          | Reference | N/A                       |
|                                     | Yes        | 149 (9)   | 114 (14) | 263  |         | 1.39      | (1.22, 1.58) | 1.29      | (1.13, 1.47)              |
| <b>Gastro-intestinal or Liver</b>   |            |           |          |      | 0.87    |           |              |           |                           |
|                                     | No         | 1609 (95) | 759 (95) | 2368 |         | Reference | N/A          | N/A       | N/A                       |
|                                     | Yes        | 81 (5)    | 37 (5)   | 118  |         | 0.98      | (0.80, 1.20) | N/A       | N/A                       |
| <b>Hematologic</b>                  |            |           |          |      | 0.87    |           |              |           |                           |
|                                     | No         | 1632 (97) | 771 (97) | 2403 |         | Reference | N/A          | N/A       | N/A                       |
|                                     | Yes        | 55 (3)    | 25 (3)   | 80   |         | 0.96      | (0.76, 1.22) | N/A       | N/A                       |
| <b>Rheumatologic or Autoimmune</b>  |            |           |          |      | 0.87    |           |              |           |                           |
|                                     | No         | 1637 (97) | 772 (97) | 2409 |         | Reference | N/A          | N/A       | N/A                       |
|                                     | Yes        | 53 (3)    | 24 (3)   | 77   |         | 0.96      | (0.74, 1.26) | N/A       | N/A                       |
| <b>Outpatient ACE-Inhibitor Use</b> |            |           |          |      | 0.99    |           |              |           |                           |
|                                     | No/Unknown | 1063 (83) | 513 (83) | 1576 |         | Reference | N/A          | N/A       | N/A                       |
|                                     | Yes        | 213 (17)  | 103 (17) | 316  |         | 0.99      | (0.84, 1.18) | N/A       | N/A                       |

|                                                                |            |           |          |      |      |           |              |           |              |
|----------------------------------------------------------------|------------|-----------|----------|------|------|-----------|--------------|-----------|--------------|
| <b>Outpatient<br/>Angiotensin<br/>Receptor<br/>Blocker Use</b> |            |           |          |      | 0.04 |           |              |           |              |
|                                                                | No/Unknown | 1118 (88) | 520 (84) | 1638 |      | Reference | N/A          | Reference | N/A          |
|                                                                | Yes        | 159 (12)  | 98 (16)  | 257  |      | 1.18      | (1.06, 1.31) | 1.07      | (0.95, 1.21) |

ICU = intensive care unit; CI = confidence interval; N/A = not applicable; ACE = angiotensin-converting-enzyme

\*Final model included age, sex, race/ethnicity, smoking status, hypertension, obesity, diabetes, chronic lung disease, cardiovascular disease, neurologic disease, renal disease, immunosuppression, and outpatient use of an angiotensin receptor blocker.

<sup>†</sup>p=0.0494

<sup>‡</sup>p=0.0524

**B. In-hospital mortality (N=2,490)\***

| Characteristic          | Category    | Discharged Alive (n=2070) | In-Hospital Death (n=420) | Total (N=2490) | P-value | Unadjusted Risk Ratio | 95% CI        | Adjusted Risk Ratio | 95% CI        |
|-------------------------|-------------|---------------------------|---------------------------|----------------|---------|-----------------------|---------------|---------------------|---------------|
| <b>Age</b>              |             |                           |                           |                | <0.0001 |                       |               |                     |               |
|                         | 18-39 years | 296 (14)                  | 6 (1)                     | 302            |         | Reference             | N/A           | Reference           | N/A           |
|                         | 40-49 years | 308 (15)                  | 10 (2)                    | 318            |         | 1.51                  | (0.59, 3.85)  | 1.23                | (0.51, 2.99)  |
|                         | 50-64 years | 670 (32)                  | 74 (18)                   | 744            |         | 4.62                  | (2.1, 10.18)  | 3.11                | (1.50, 6.46)  |
|                         | 65-74 years | 375 (18)                  | 103 (25)                  | 478            |         | 9.88                  | (4.28, 22.85) | 5.77                | (2.64, 12.64) |
|                         | 75-84 years | 277 (13)                  | 120 (29)                  | 397            |         | 13.89                 | (6.12, 31.52) | 7.67                | (3.35, 17.59) |
|                         | 85+ years   | 144 (7)                   | 107 (25)                  | 251            |         | 19.46                 | (9.39, 40.35) | 10.98               | (5.09, 23.69) |
| <b>Sex</b>              |             |                           |                           |                | 0.03    |                       |               |                     |               |
|                         | Female      | 988 (48)                  | 176 (42)                  | 1164           |         | Reference             | N/A           | Reference           | N/A           |
|                         | Male        | 1082 (52)                 | 244 (58)                  | 1326           |         | 1.22                  | (1.02, 1.47)  | 1.30                | (1.14, 1.49)  |
| <b>Race/ethnicity</b>   |             |                           |                           |                | <0.0001 |                       |               |                     |               |
|                         | NH White    | 944 (46)                  | 234 (56)                  | 1178           |         | Reference             | N/A           | Reference           | N/A           |
|                         | NH Black    | 637 (31)                  | 117 (28)                  | 754            |         | 0.75                  | (0.57, 0.99)  | 1.07                | (0.85, 1.35)  |
|                         | Hispanic    | 281 (14)                  | 25 (6)                    | 306            |         | 0.42                  | (0.32, 0.56)  | 1.17                | (0.91, 1.51)  |
|                         | NH Other    | 132 (6)                   | 26 (6)                    | 158            |         | 0.82                  | (0.54, 1.25)  | 1.26                | (0.86, 1.82)  |
|                         | Unknown     | 76 (4)                    | 17 (4)                    | 93             |         | 0.91                  | (0.44, 1.88)  | 1.30                | (0.74, 2.31)  |
| <b>Smoker</b>           |             |                           |                           |                | <0.0001 |                       |               |                     |               |
|                         | No/Unknown  | 1461 (71)                 | 236 (56)                  | 1697           |         | Reference             | N/A           | Reference           | NA            |
|                         | Former      | 481 (23)                  | 161 (38)                  | 642            |         | 1.75                  | (1.51, 2.04)  | 1.14                | (0.98, 1.33)  |
|                         | Current     | 128 (6)                   | 22 (5)                    | 150            |         | 1.06                  | (0.75, 1.49)  | 1.22                | (0.99, 1.51)  |
| <b>Hypertension</b>     |             |                           |                           |                | <0.0001 |                       |               |                     |               |
|                         | No          | 955 (46)                  | 105 (25)                  | 1060           |         | Reference             | N/A           | Reference           | NA            |
|                         | Yes         | 1114 (54)                 | 314 (75)                  | 1428           |         | 2.18                  | (1.66, 2.86)  | 1.07                | (0.79, 1.45)  |
| <b>Obesity (BMI≥30)</b> |             |                           |                           |                | 0.001   |                       |               |                     |               |
|                         | No          | 944 (49)                  | 224 (58)                  | 1168           |         | Reference             | N/A           | Reference           | N/A           |
|                         | Yes         | 992 (51)                  | 162 (42)                  | 1154           |         | 0.73                  | (0.61, 0.86)  | 1.09                | (0.92, 1.30)  |
| <b>Diabetes</b>         |             |                           |                           |                | <0.0001 |                       |               |                     |               |

|                                     |            |           |          |      |         |           |              |           |              |
|-------------------------------------|------------|-----------|----------|------|---------|-----------|--------------|-----------|--------------|
|                                     | No         | 1423 (69) | 244 (58) | 1667 |         | Reference | N/A          | Reference | N/A          |
|                                     | Yes        | 644 (31)  | 175 (42) | 819  |         | 1.44      | (1.2, 1.72)  | 1.19      | (1.01, 1.40) |
| <b>Chronic Lung Disease</b>         |            |           |          |      | <0.0001 |           |              |           |              |
|                                     | No         | 1489 (72) | 248 (59) | 1737 |         | Reference | N/A          | Reference | N/A          |
|                                     | Yes        | 577 (28)  | 170 (41) | 747  |         | 1.56      | (1.27, 1.91) | 1.31      | (1.13, 1.52) |
| <b>Cardiovascular Disease</b>       |            |           |          |      | <0.0001 |           |              |           |              |
|                                     | No         | 1462 (71) | 165 (39) | 1627 |         | Reference | N/A          | Reference | N/A          |
|                                     | Yes        | 605 (29)  | 254 (61) | 859  |         | 2.85      | (2.42, 3.36) | 1.28      | (1.03, 1.58) |
| <b>Neurologic</b>                   |            |           |          |      | <0.0001 |           |              |           |              |
|                                     | No         | 1674 (81) | 262 (63) | 1936 |         | Reference | N/A          | Reference | N/A          |
|                                     | Yes        | 391 (19)  | 157 (37) | 548  |         | 2.10      | (1.72, 2.56) | 1.25      | (1.04, 1.50) |
| <b>Renal</b>                        |            |           |          |      | <0.0001 |           |              |           |              |
|                                     | No         | 1814 (88) | 288 (69) | 2102 |         | Reference | N/A          | Reference | N/A          |
|                                     | Yes        | 255 (12)  | 131 (31) | 386  |         | 2.45      | (2.04, 2.93) | 1.33      | (1.10, 1.61) |
| <b>Immuno-suppression</b>           |            |           |          |      | <0.0001 |           |              |           |              |
|                                     | No         | 1873 (91) | 351 (84) | 2224 |         | Reference | N/A          | Reference | N/A          |
|                                     | Yes        | 195 (9)   | 68 (16)  | 263  |         | 1.58      | (1.33, 1.88) | 1.39      | (1.13, 1.70) |
| <b>Gastro-intestinal or Liver</b>   |            |           |          |      | 0.12    |           |              |           |              |
|                                     | No         | 1975 (96) | 393 (94) | 2368 |         | Reference | N/A          | N/A       | N/A          |
|                                     | Yes        | 92 (4)    | 26 (6)   | 118  |         | 1.30      | (1.00, 1.70) | N/A       | N/A          |
| <b>Hematologic</b>                  |            |           |          |      | 0.02    |           |              |           |              |
|                                     | No         | 2005 (97) | 398 (95) | 2403 |         | Reference | N/A          | Reference | N/A          |
|                                     | Yes        | 59 (3)    | 21 (5)   | 80   |         | 1.54      | (1.11, 2.12) | 1.33      | (0.93, 1.9)  |
| <b>Rheumatologic or Autoimmune</b>  |            |           |          |      | 0.03    |           |              |           |              |
|                                     | No         | 2010 (97) | 399 (95) | 2409 |         | Reference | N/A          | Reference | N/A          |
|                                     | Yes        | 57 (3)    | 20 (5)   | 77   |         | 1.53      | (1.03, 2.29) | 0.87      | (0.66, 1.16) |
| <b>Outpatient ACE-Inhibitor Use</b> |            |           |          |      | 0.99    |           |              |           |              |
|                                     | No/Unknown | 1312 (83) | 264 (83) | 1576 |         | Reference | N/A          | N/A       | N/A          |
|                                     | Yes        | 263 (17)  | 53 (17)  | 316  |         | 0.98      | (0.74, 1.30) | N/A       | N/A          |
| <b>Outpatient Angiotensin</b>       |            |           |          |      | 0.11    |           |              |           |              |
|                                     | No/Unknown | 1372 (87) | 266 (84) | 1638 |         | Reference | N/A          | N/A       | N/A          |

|                             |     |          |         |     |  |      |              |     |     |
|-----------------------------|-----|----------|---------|-----|--|------|--------------|-----|-----|
| <b>Receptor Blocker Use</b> | Yes | 205 (13) | 52 (16) | 257 |  | 1.19 | (0.91, 1.57) | N/A | N/A |
|-----------------------------|-----|----------|---------|-----|--|------|--------------|-----|-----|

CI = confidence interval; N/A = not applicable; ACE = angiotensin-converting-enzyme

\*Final model adjusted for age, sex, race/ethnicity, smoker, hypertension, obesity, diabetes, chronic lung disease, cardiovascular disease, neurologic disease, renal disease, immunosuppression, hematologic disorders, and rheumatologic or autoimmune disease.
